# Supplementary material
Source: publisher site journal article supplement (https://www.dovepress.com/article/314461)
Supplement: Supplementary file 1 [file get_supplementary_file.php]

**
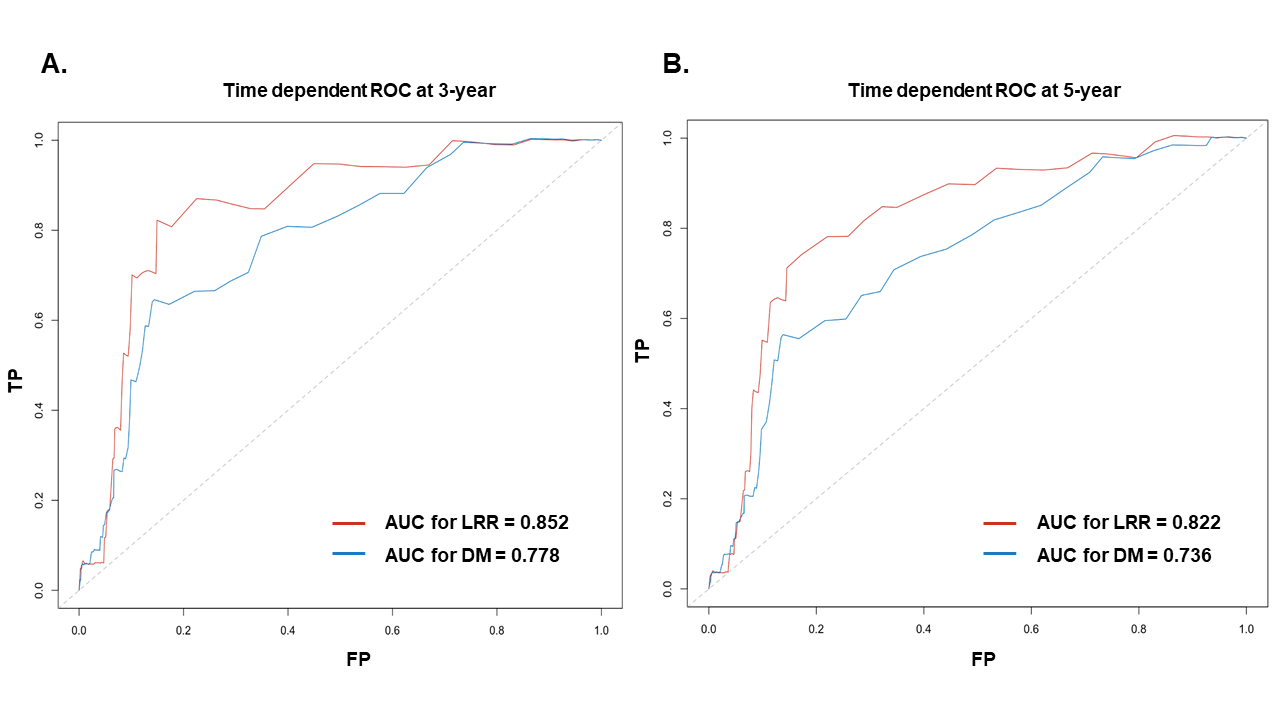
**

Supplementary Figure S1. Comparison of the prognostic performance of RS between LRR and DM risk at 3-year (A) and 5-year (B).

Abbreviations: RS, recurrence score; LRR, loco-regional recurrence; DM, distant metastasis; AUC, area under curve; TP, true positive; FP, false positive.


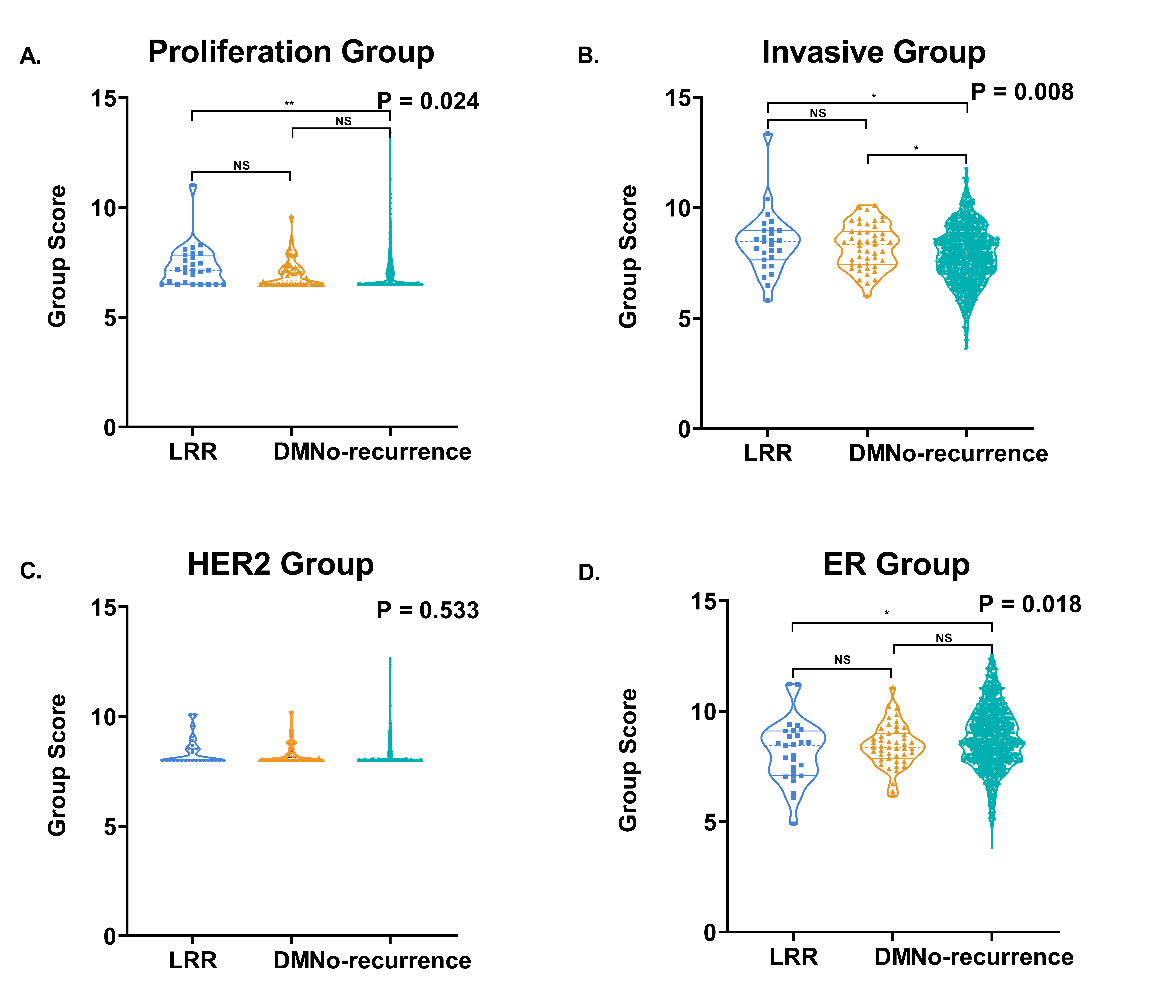


Supplementary Figure S2. Distribution of each group score of 21-gene RS in breast cancer patients with LRR, DM and no-recurrence.

Abbreviations: RS, recurrence score; LRR, loco-regional recurrence; DM, distant metastasis.
